# Supplementary material
Source: ML conference proceedings conference paper supplement (https://openreview.net/forum?id=DcpUkPHRJw)

Distance Between Our and Comparison-Based Solutions  
(10 Agents)

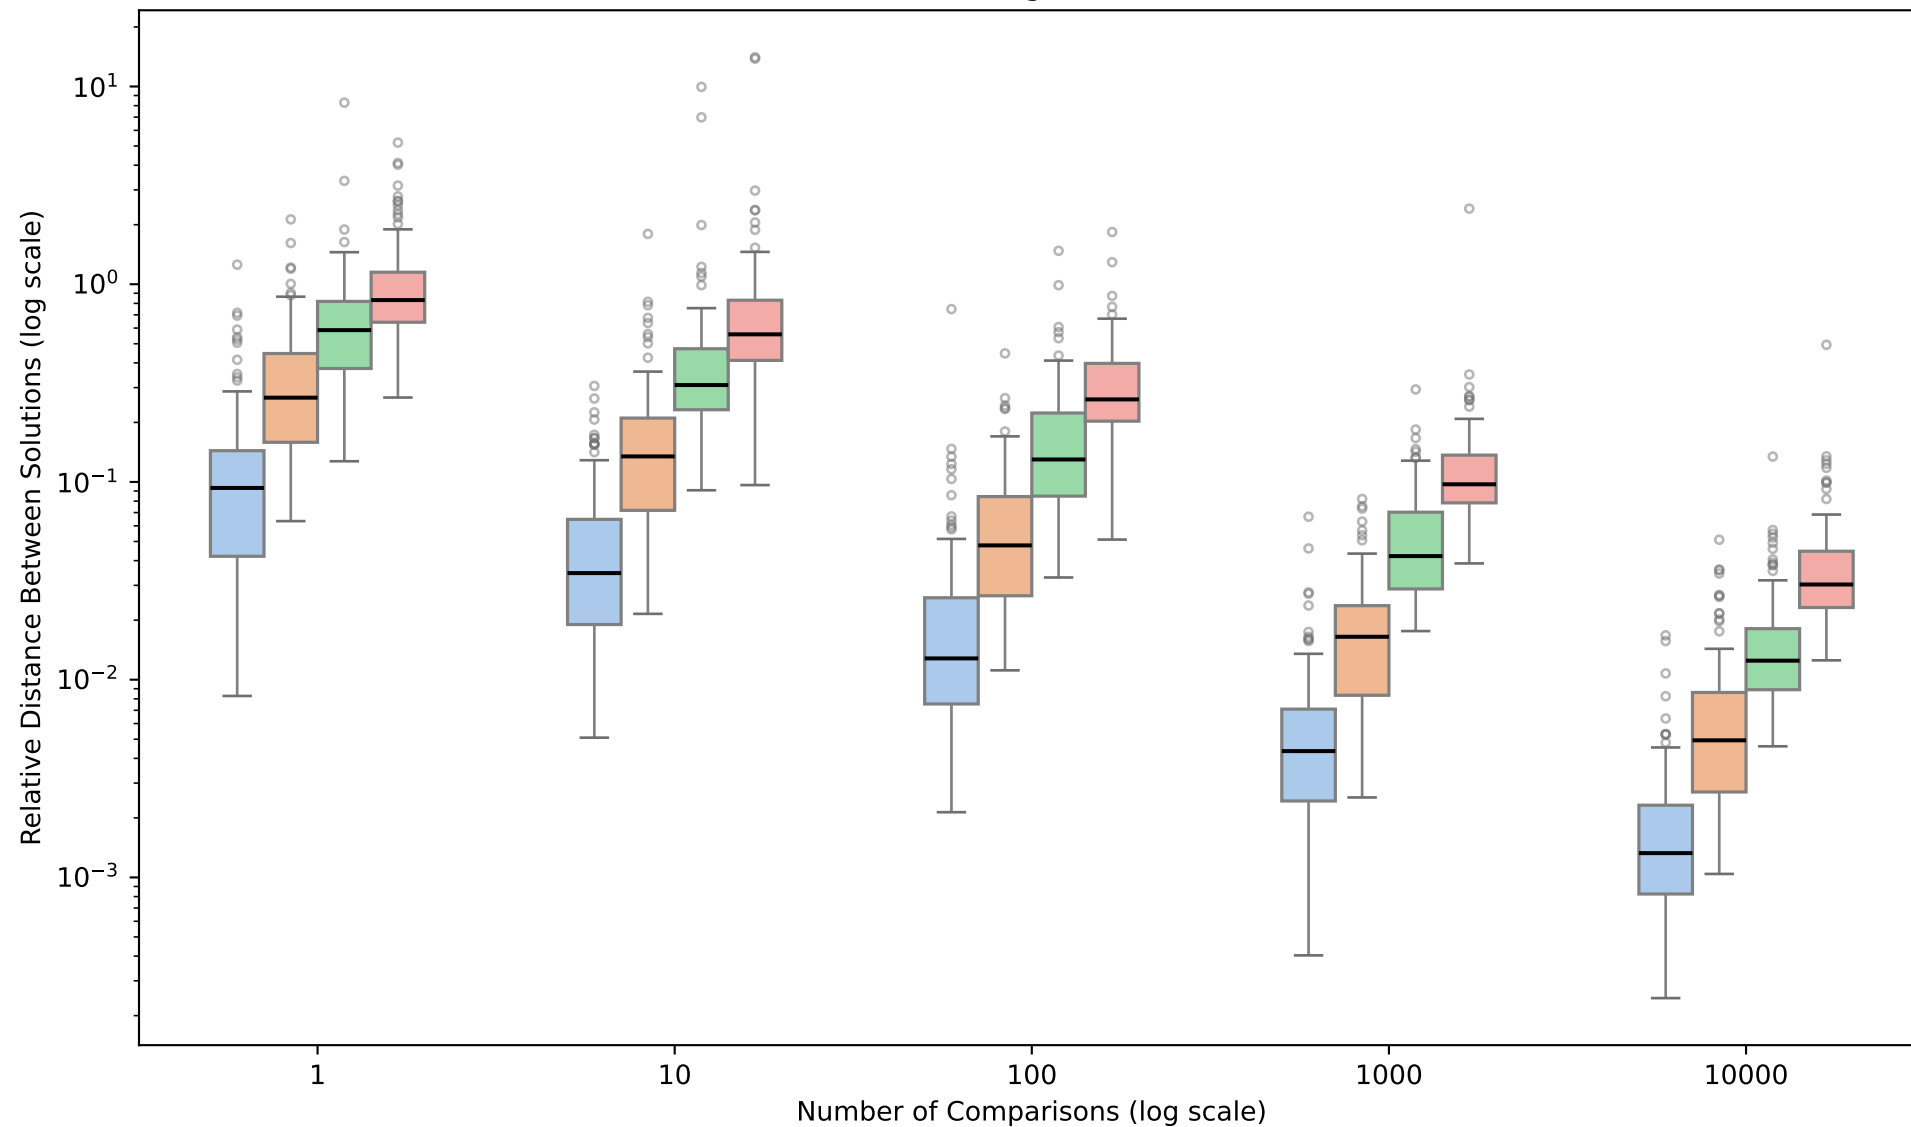

Supplement: supplementary_material [file box_plot_10_agents.pdf › dibs_bargaining/portfolio_environment/plots/box_plot_10_agents.pdf]

Distance Between Our and Comparison-Based Solutions  
(2 Agents)

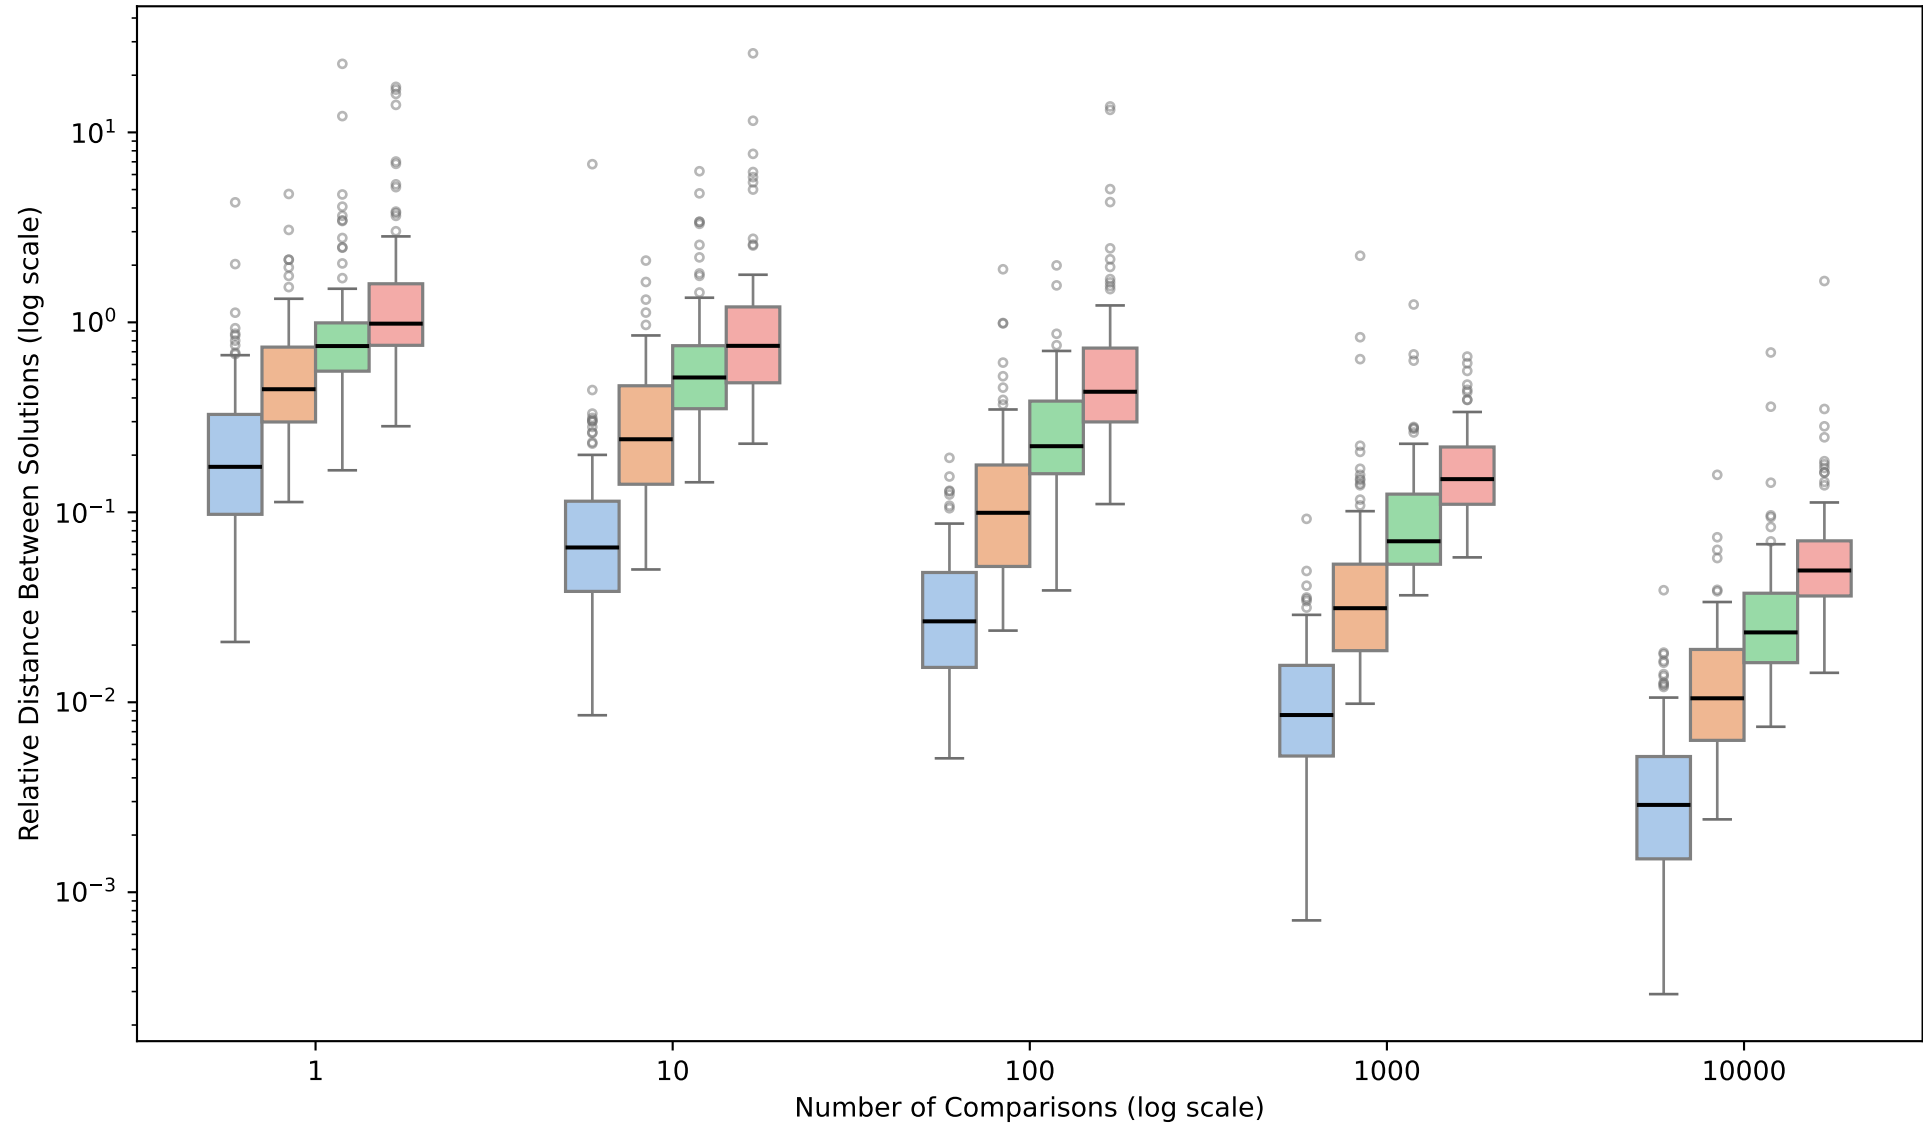

Supplement: supplementary_material [file box_plot_2_agents.pdf › dibs_bargaining/portfolio_environment/plots/box_plot_2_agents.pdf]

Distance Between Our and Comparison-Based Solutions  
(3 Agents)

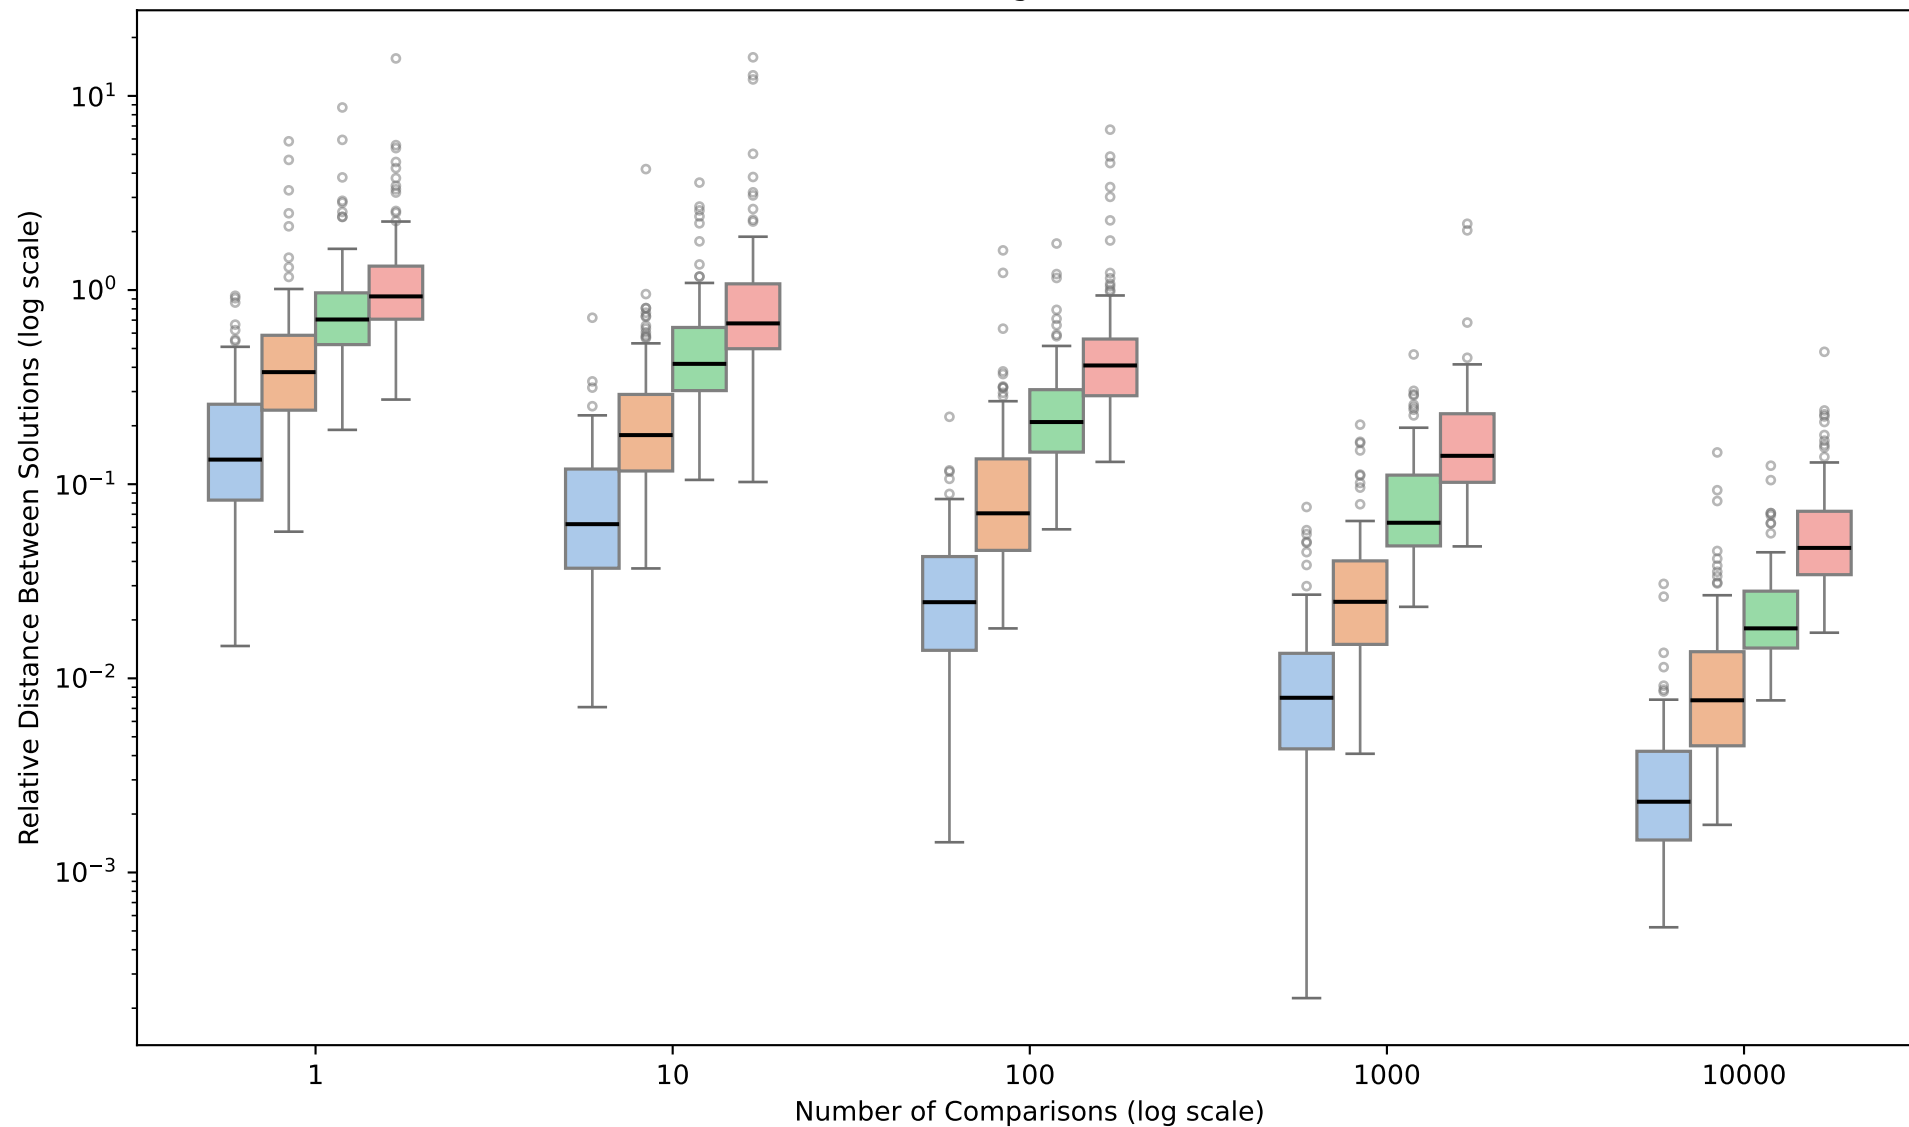

Supplement: supplementary_material [file box_plot_3_agents.pdf › dibs_bargaining/portfolio_environment/plots/box_plot_3_agents.pdf]

Distance Between Our and Comparison-Based Solutions  
(5 Agents)

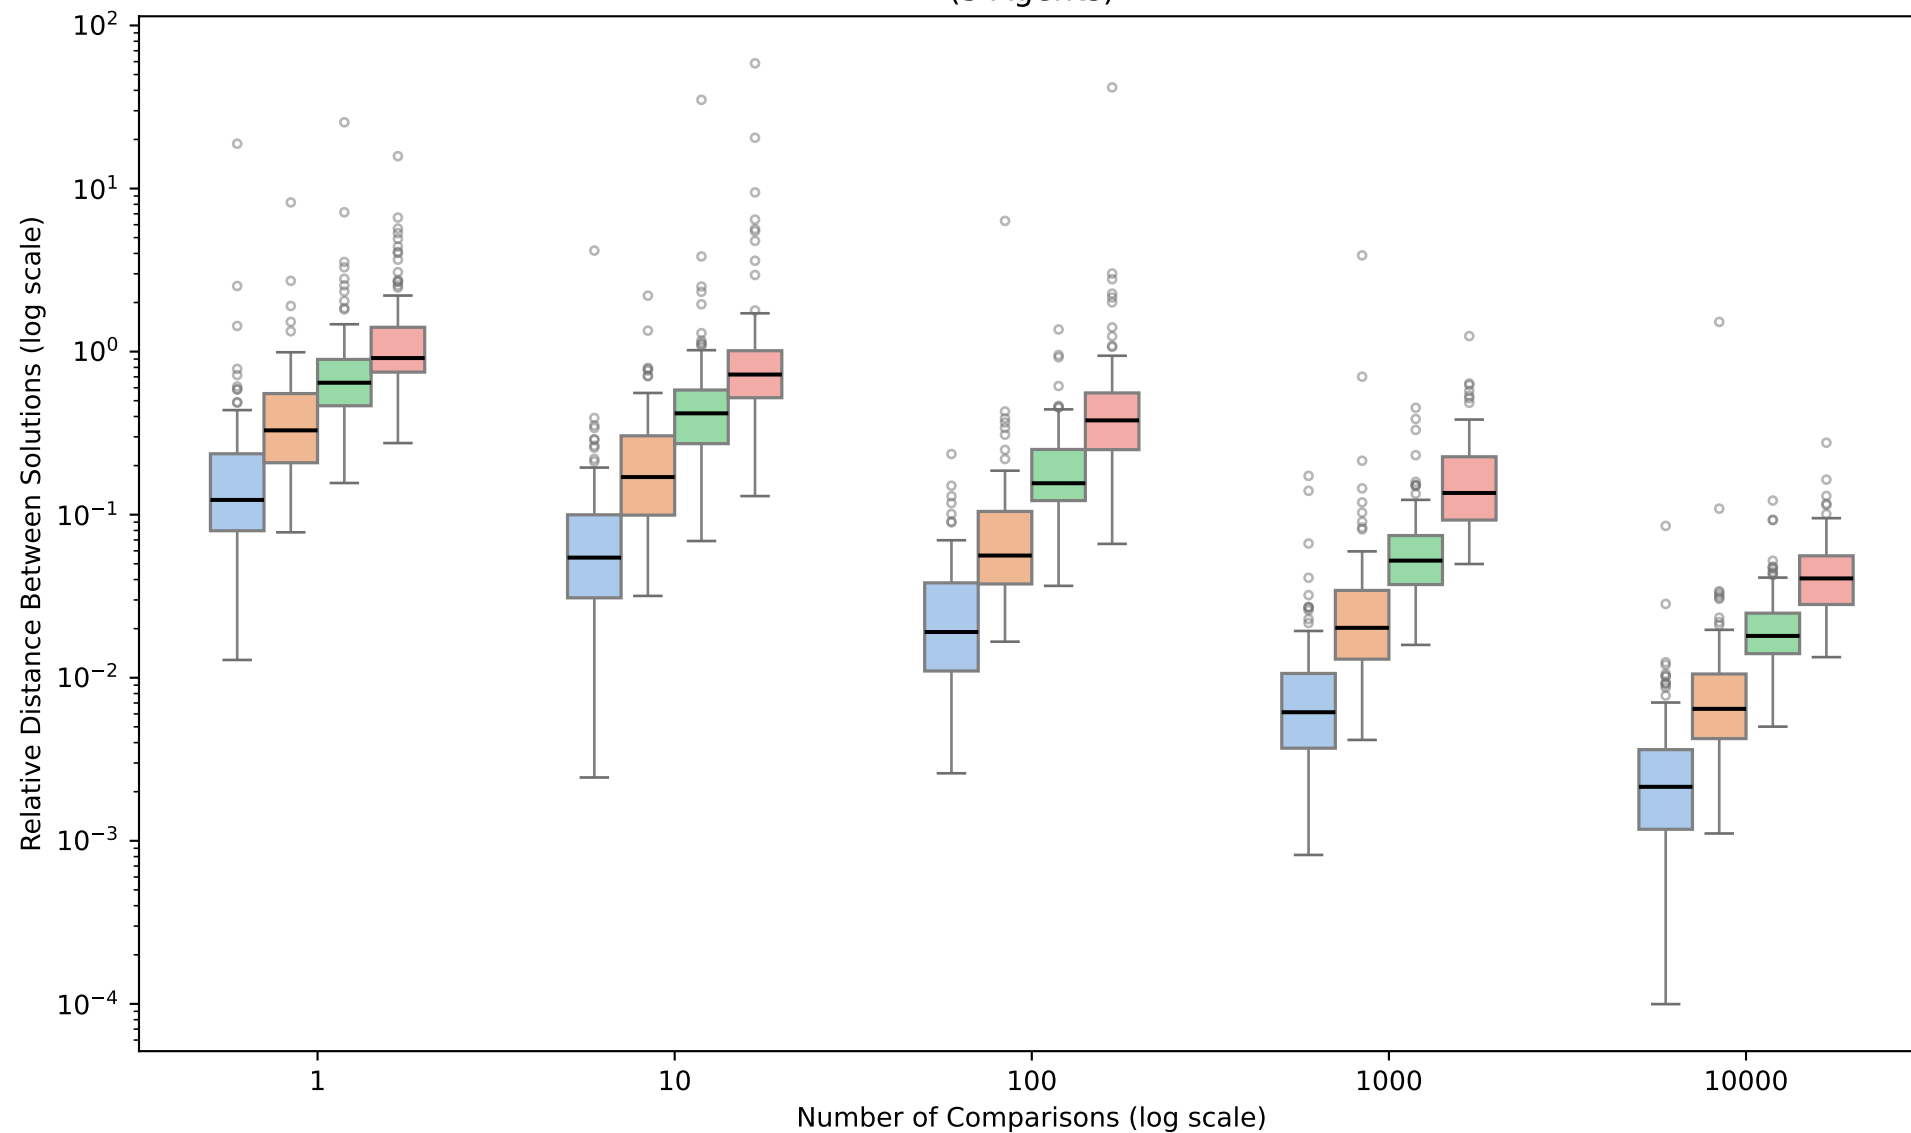

Supplement: supplementary_material [file box_plot_5_agents.pdf › dibs_bargaining/portfolio_environment/plots/box_plot_5_agents.pdf]
